# Supplementary material
Source: publisher figshare collection journal article supplement (https://tandf.figshare.com/ndownloader/files/13152425)
Supplement: Supplementary file 1 [file 13152425]

**Supplementary Material**


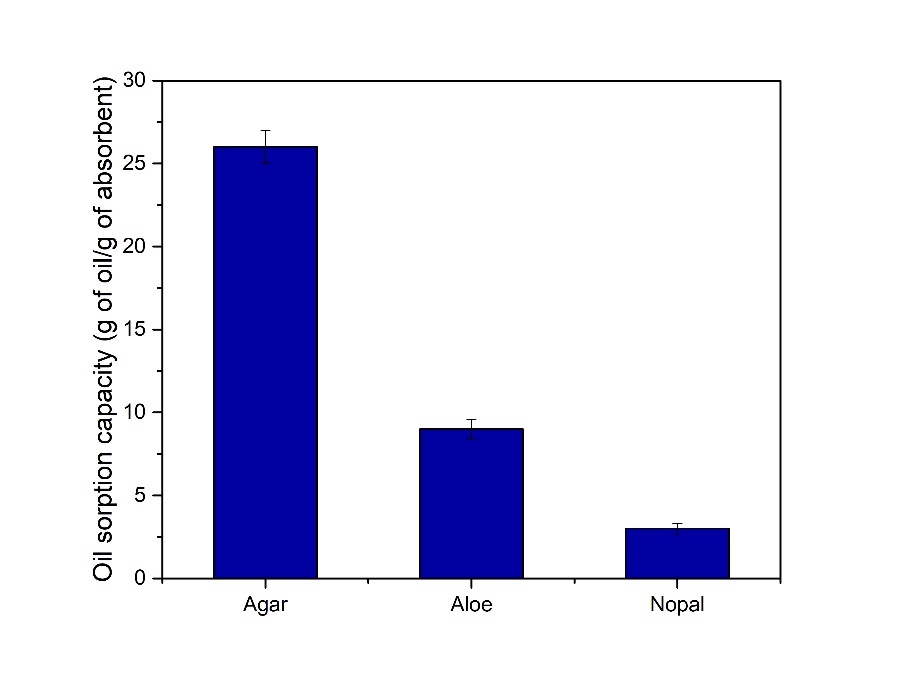


**Figure S1.** Absorption capacity of lyophilized natural sorbents.


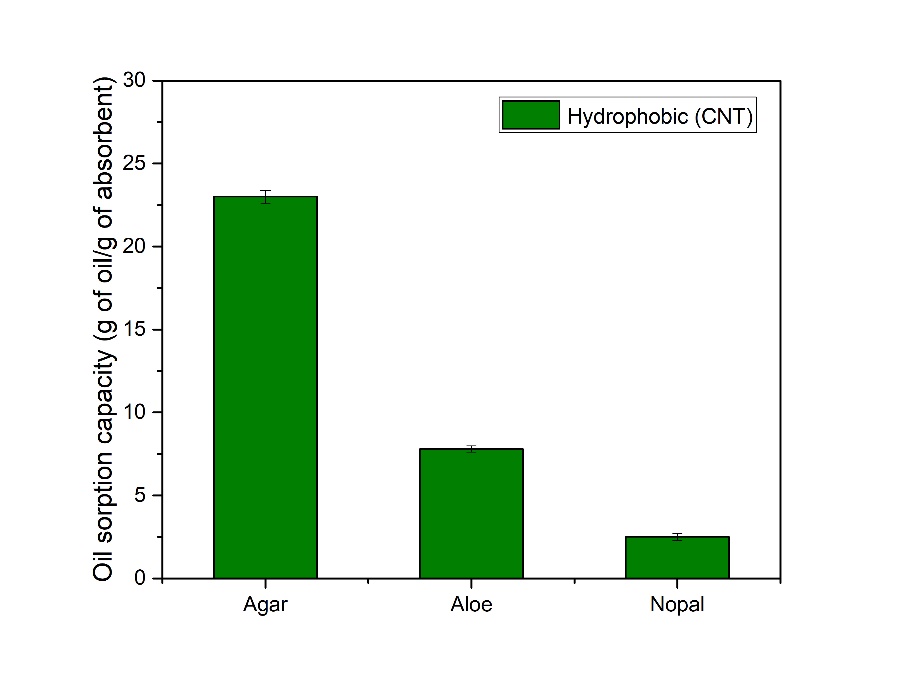


**Figure S2**. Absorption capacities for the MWCNT composites.


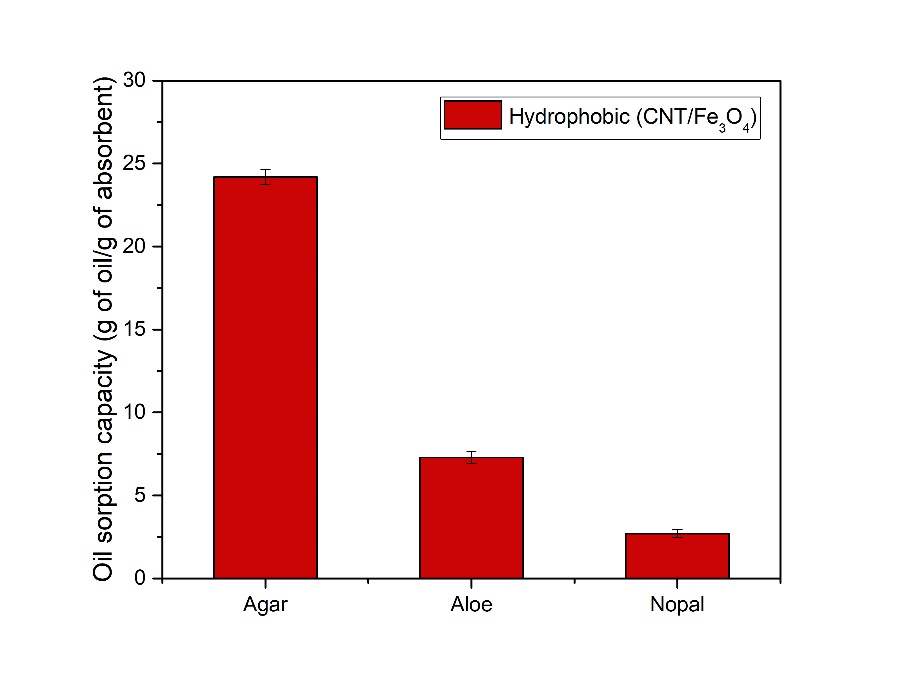


**Figure S3.** Absorption capacities of composites hydrophobized with MWCNTs-Fe3O4.


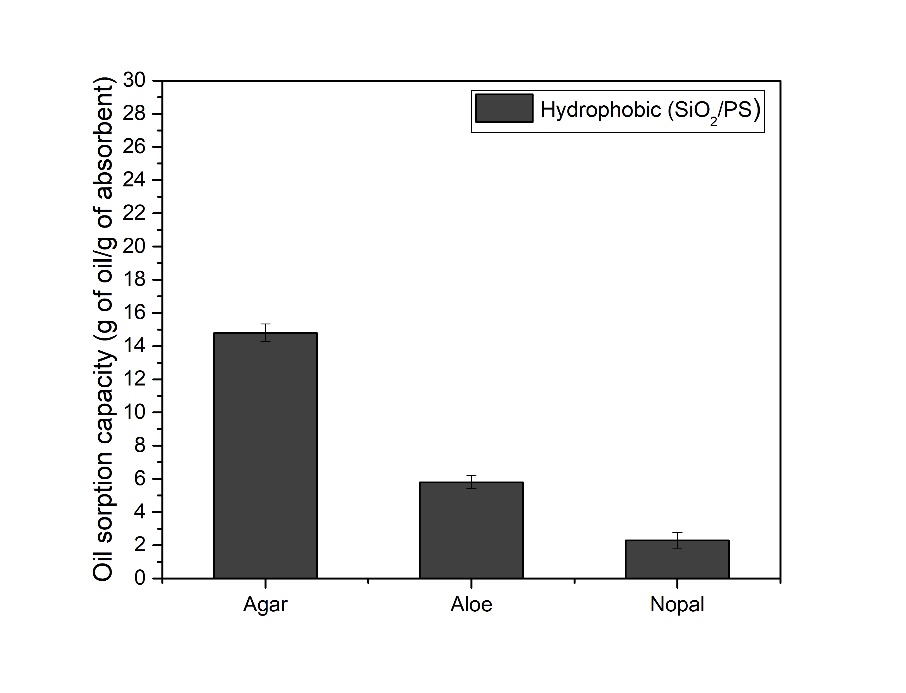


**Figure S4.** Absorption capacity for samples hydrophobized with PS/SiO2.


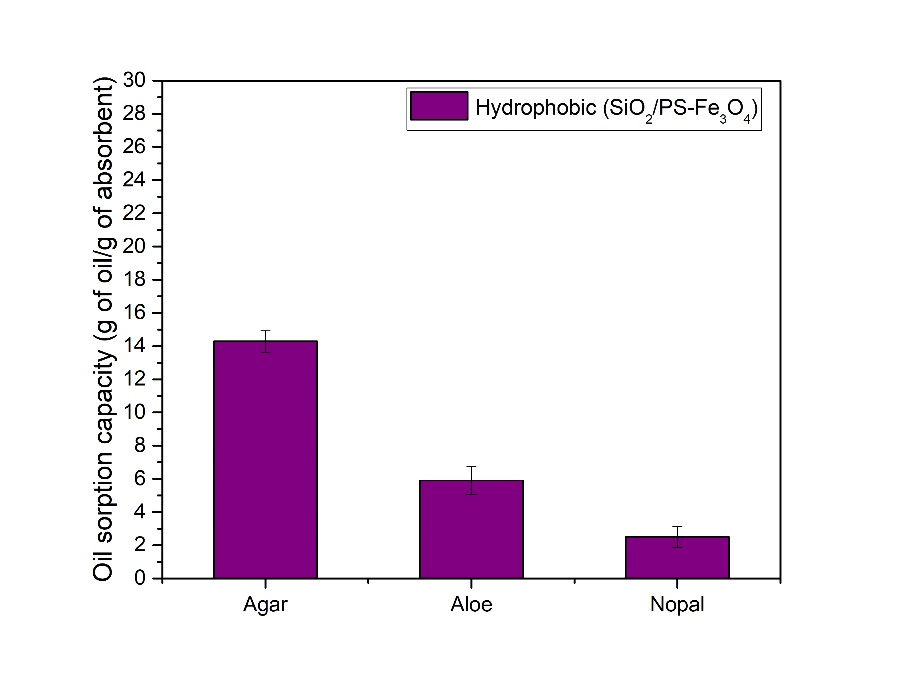


**Figure S5.** Absorption capacities of samples hydrophobized with PS/SiO2 -Fe3O4.
